# Supplementary material
Source: Elsevier journal article supplement (https://www.sciencedirect.com/science/article/pii/S2341287921001423)
Supplement: mmc1 [file S2341287921001423:mmc1.pdf]

## ESTUDIO DE LOS PACIENTES PEDIÁTRICOS CRÓNICOS COMPLEJOS INGRESADOS EN UN SERVICIO DE PEDIATRÍA A LO LARGO DE 12 MESES

A continuación se detallan los cambios realizados y la justificación de dichos cambios a partir de las sugerencias aportadas por los revisores.

### GENERALIDADES

**1. Revisar algunas palabras que están unidas (sin espacio separador entre ellas) y números sin punto separador de miles.**

Se han introducido las modificaciones señaladas.

### RESULTADOS

**1. Apartado Análisis de los pacientes en función del subgrupo. Frase "En la Tabla 2 se exponen las diferencias que fueron estadísticamente significativas en entre los distintos subgrupos". Según entiendo, la Tabla 2 no sólo muestra los resultados estadísticamente significativos puesto que muestra la variable "Patología que motiva el ingreso" en la que parece no haber diferencias significativas en todos los apartados o al menos no se especifica su p-valor.**

En la tabla 2, la variable "circunstancia que motiva el ingreso" (renombrada a sugerencia de los revisores, ver más adelante apartado TABLAS), se ha especificado el valor p para cada uno de los apartados. El texto se ha modificado por "En la Tabla 2 se exponen las principales diferencias clínicas entre los distintos subgrupos".

**2. Incluir en este apartado que el número de medicamentos y citas en consulta hospitalaria fue mayor de forma estadísticamente significativa en el grupo PCC frente al de agudos y crónicos puesto que son resultados que después de mencionan en al párrafo 3 de la discusión. Lo mismo ocurre con el porcentaje inmigrantes también superior en grupo PCC, dicho resultado se menciona en párrafo 5 de la discusión.**

Se han incluido en este apartado las modificaciones sugeridas por los revisores.

### DISCUSIÓN

**1. Párrafo 7. Según el texto del Ministerio de Sanidad sobre los GRD (cita 24) los Grupos de Diagnóstico Relacionados (GDR) utilizan variables demográficas y de diagnóstico para clasificar a los pacientes en grupos que se puedan comparar clínicamente, con duraciones de estancia en el hospital y con consumos de recursos similares. La frase "permite detecta los pacientes más graves o con mayores dificultades de tratamiento" considero que no está exactamente dentro del alcance de los GRDs.**

Los autores coinciden con los revisores que la afirmación de que los GRDs pueden permitir detectar los pacientes más graves o con mayores dificultades de tratamiento excede la definición de dicha herramienta, por lo que la frase ha sido eliminada del manuscrito.

## TABLAS

1  
2  
3 **1. Tabla 2. En la variable "Patología que motiva el ingreso" la clasificación "tratamiento" es**  
4 **difícil de ser entendida como "patología". Aclarar si se trata de "necesidad de tratamiento**  
5 **hospitalario" y quizás en este caso sería bueno renombrar la variable como "Circunstancia**  
6 **que motiva el ingreso" con la clasificación de: Patología respiratoria, patología infecciosa,**  
7 **patología neurológica, patología digestiva, necesidad de tratamiento hospitalario y otros.**  
8

9  
10 Efectivamente, los autores se refieren a la necesidad de tratamiento hospitalario al utilizar el  
11 término "tratamiento". A fin de facilitar la comprensión, se ha renombrado la variable  
12 "Patología que motiva el ingreso" y la variable "tratamiento" siguiendo las sugerencias de los  
13 revisores.  
14  
15  
16  
17  
18  
19  
20  
21  
22  
23  
24  
25  
26  
27  
28  
29  
30  
31  
32  
33  
34  
35  
36  
37  
38  
39  
40  
41  
42  
43  
44  
45  
46  
47  
48  
49  
50  
51  
52  
53  
54  
55  
56  
57  
58  
59  
60  
61  
62  
63  
64  
65
