# Supplementary material
Source: Elsevier journal article supplement (https://www.sciencedirect.com/science/article/pii/S2341287921001423)
Supplement: mmc1 [file S2341287921001423:mmc1.pdf]

## ESTUDIO DE LOS PACIENTES PEDIÁTRICOS CRÓNICOS COMPLEJOS INGRESADOS EN UN SERVICIO DE PEDIATRÍA A LO LARGO DE 12 MESES

A continuación se detallan los cambios realizados y la justificación de dichos cambios a partir de las sugerencias aportadas por los revisores.

### GENERALIDADES

**1. Revisar algunas palabras que están unidas (sin espacio separador entre ellas) y números sin punto separador de miles.**

Se han introducido las modificaciones señaladas.

### RESULTADOS

**1. Apartado Análisis de los pacientes en función del subgrupo. Frase "En la Tabla 2 se exponen las diferencias que fueron estadísticamente significativas en entre los distintos subgrupos". Según entiendo, la Tabla 2 no sólo muestra los resultados estadísticamente significativos puesto que muestra la variable "Patología que motiva el ingreso" en la que parece no haber diferencias significativas en todos los apartados o al menos no se especifica su p-valor.**

En la tabla 2, la variable "circunstancia que motiva el ingreso" (renombrada a sugerencia de los revisores, ver más adelante apartado TABLAS), se ha especificado el valor p para cada uno de los apartados. El texto se ha modificado por "En la Tabla 2 se exponen las principales diferencias clínicas entre los distintos subgrupos".

**2. Incluir en este apartado que el número de medicamentos y citas en consulta hospitalaria fue mayor de forma estadísticamente significativa en el grupo PCC frente al de agudos y crónicos puesto que son resultados que después de mencionan en al párrafo 3 de la discusión. Lo mismo ocurre con el porcentaje inmigrantes también superior en grupo PCC, dicho resultado se menciona en párrafo 5 de la discusión.**

Se han incluido en este apartado las modificaciones sugeridas por los revisores.

### DISCUSIÓN

**1. Párrafo 7. Según el texto del Ministerio de Sanidad sobre los GRD (cita 24) los Grupos de Diagnóstico Relacionados (GDR) utilizan variables demográficas y de diagnóstico para clasificar a los pacientes en grupos que se puedan comparar clínicamente, con duraciones de estancia en el hospital y con consumos de recursos similares. La frase "permite detecta los pacientes más graves o con mayores dificultades de tratamiento" considero que no está exactamente dentro del alcance de los GRDs.**

Los autores coinciden con los revisores que la afirmación de que los GRDs pueden permitir detectar los pacientes más graves o con mayores dificultades de tratamiento excede la definición de dicha herramienta, por lo que la frase ha sido eliminada del manuscrito.

TABLAS

**1. Tabla 2. En la variable "Patología que motiva el ingreso" la clasificación "tratamiento" es difícil de ser entendida como "patología". Aclarar si se trata de "necesidad de tratamiento hospitalario" y quizás en este caso sería bueno renombrar la variable como "Circunstancia que motiva el ingreso" con la clasificación de: Patología respiratoria, patología infecciosa, patología neurológica, patología digestiva, necesidad de tratamiento hospitalario y otros.**

Efectivamente, los autores se refieren a la necesidad de tratamiento hospitalario al utilizar el término "tratamiento". A fin de facilitar la comprensión, se ha renombrado la variable "Patología que motiva el ingreso" y la variable "tratamiento" siguiendo las sugerencias de los revisores.
